# Supplementary material for: Threshold-limited spreading in social networks with multiple initiators
Source: PubMed Central journal article supplement — Sci Rep. 2013 Jul 31;3:2330. doi: 10.1038/srep02330 (PMC3728590; doi:10.1038/srep02330), 2013-07-31
Supplement: srep02330-s1.pdf [file srep02330-s1.pdf]

# Threshold-limited spreading in social networks with multiple initiators

## Supplementary Information

P. Singh<sup>1,2</sup> \*; S. Sreenivasan<sup>1,2,3</sup>, B.K. Szymanski<sup>2,3</sup>, G. Korniss<sup>1,2</sup>

June 24, 2013

<sup>1</sup> Department of Physics, Applied Physics, and Astronomy, Rensselaer Polytechnic Institute, 110 8<sup>th</sup> Street, Troy, NY, 12180-3590 USA

<sup>2</sup> Social Cognitive Networks Academic Research Center, Rensselaer Polytechnic Institute, 110 8<sup>th</sup> Street, Troy, NY, 12180-3590 USA

<sup>3</sup> Department of Computer Science, Rensselaer Polytechnic Institute, 110 8<sup>th</sup> Street, Troy, NY, 12180-3590 USA

### S.1 Transition and tipping point for different $N$ and $\langle k \rangle$

The critical initiator fraction required to trigger cascades in ER networks is found to be independent of the network size  $N$ . However, it increases with the increase in average degree  $\langle k \rangle$ . In Fig. S1 (a) and (b), we show more results on critical initiator fraction  $p_c$  similar to what is shown Fig. 2 (a) and (b) (in the main text) but for a different  $\langle k \rangle$  and  $N$ . We observe a similar qualitative behavior where a transition takes place when a critical value of  $p$  is reached.

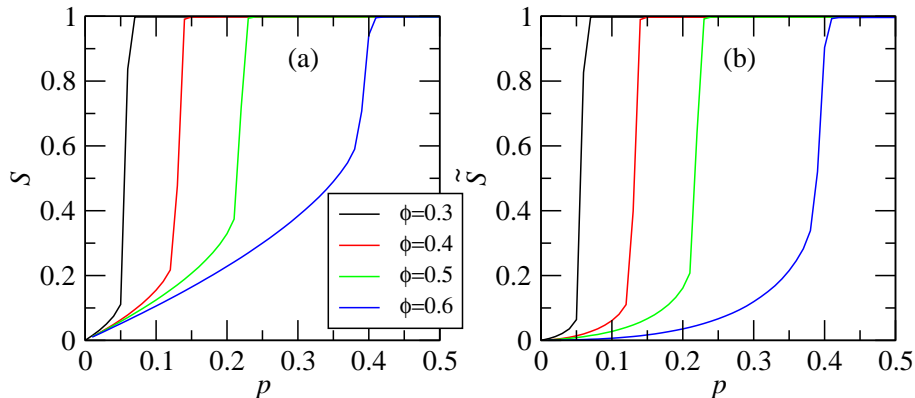

Figure S1: (a) Cascade size  $S$  as a function of  $p$  for ER networks with  $N = 5000$  and  $\langle k \rangle = 6.0$ . (b) Scaled cascade size  $\tilde{S}$  for the same set of parameters

### S.2 Transition and tipping point for different selection strategies

We also employed the three selection strategies (selecting initiators by their degrees, k-shell scores, and randomly) as discussed in the main text in the context of cascade windows, to see how it affects the critical

---

\*E-mail: singhp4@rpi.edu

point. We find that  $p_c$  is the smallest (transition happens for a smaller  $p$ ) for the highest degree method (Fig. S2). This is consistent with our finding that selection by degree works best.

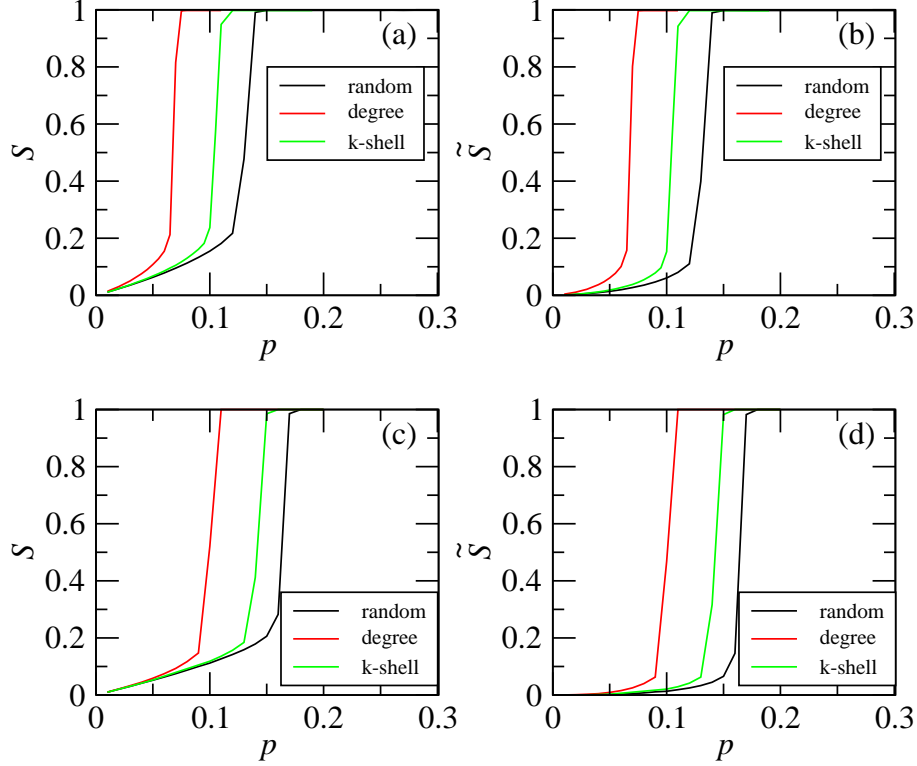

Figure S2: Three strategies of selecting the initiator nodes (a)  $S$  as a function of  $p$  (b) Scaled  $\tilde{S}$  as a function of  $p$ , for ER networks with  $\langle k \rangle = 6.0$ . (c)  $S$  as a function of  $p$  (d) Scaled  $\tilde{S}$  as a function of  $p$ , for ER networks with  $\langle k \rangle = 10.0$ . All results are for  $\phi = 0.4$  and network size  $N = 5000$ .

### S.3 Analytic approximation for cascade size

Gleeson and Cahalane [3] obtained an asymptotic expression for the eventual cascade size  $S$

$$S = p + (1 - p) \sum_{k=1}^{\infty} p_k \sum_{m=0}^k \binom{k}{m} q_{\infty}^m (1 - q_{\infty})^{k-m} F\left(\frac{m}{k}\right), \quad (1)$$

where  $p_k = e^{-\langle k \rangle} \langle k \rangle^k / k!$  is the degree distribution of ER networks, and  $q_{\infty}$  is the fixed point of the following recursion relation (for  $n = 0, 1, 2, \dots$  with  $q_0 = p$ )

$$q_{n+1} = p + (1 - p)G(q_n), \quad (2)$$

with

$$G(q) = \sum_{k=1}^{\infty} \frac{k}{\langle k \rangle} p_k \sum_{m=0}^{k-1} \binom{k-1}{m} q^m (1 - q)^{k-1-m} F\left(\frac{m}{k}\right). \quad (3)$$

$G(q)$  can also be written as  $\sum_{l=0}^{\infty} C_l q^l$  where

$$C_l = \sum_{k=l+1}^{\infty} \sum_{n=0}^l \binom{k-1}{l} \binom{l}{n} (-1)^{l+n} \frac{k}{\langle k \rangle} p_k F\left(\frac{n}{k}\right). \quad (4)$$

For the case of uniform threshold distribution, the function  $F$  takes the form of a step function ( $F(\frac{m}{k}) = 1$  if  $\frac{m}{k} \geq \phi$  and  $F(\frac{m}{k}) = 0$  otherwise). In the approximation where only the linear and  $q^2$  terms are considered, the cascade conditions (respectively for the first and second order) are written as [3] (for uniform distribution of thresholds,  $C_0 = 0$ )

$$(1 - p)C_1 > 1, \tag{5}$$

and

$$(C_1 - 1)^2 + 2p(C_1 - C_1^2 - 2C_2) < 0. \tag{6}$$

To obtain  $p_c$ , we systematically increase  $p$  from 0. The smallest value of  $p$  for which either one of the above equations(5 or 6) is satisfied, gives an estimate of  $p_c$ .

## S.4 Clustering coefficient

Clustering coefficient  $C_i$  for a node in an undirected network is defined as the number of links among its neighbors divided by the total number of possible links among its neighbors [1].

$$C_i = \frac{2E_i}{k_i(k_i - 1)}, \tag{7}$$

where  $E_i$  is the total number of links among the neighbors of  $i$  and  $k_i$  is the degree of node  $i$ . The average clustering coefficient  $C$  for the network is the average of  $C_i$ 's of all nodes in the network [2].

$$C = \frac{1}{N} \sum_{i=1}^N C_i. \tag{8}$$

Both randomization methods (x-swap and exact sampling method) discussed in the main text, leave the original degree sequence unchanged. However during this process, local clustering present in the network is destroyed (as shown in Table S1). In Fig. S3, starting from the original high-school network, we show how  $C$  changes at each time step during X-swap randomization.

| Network        | C (before randomization) | C (after randomization) |
|----------------|--------------------------|-------------------------|
| X-swapped      | 0.125441                 | 0.007648                |
| Exact sampling | 0.125441                 | 0.008533                |

Table S1: Clustering coefficient of the high-school network before and after randomization for a single run. For the x-swapped network,  $C$  was measured after  $t = 6000$  time steps (when it stabilizes).

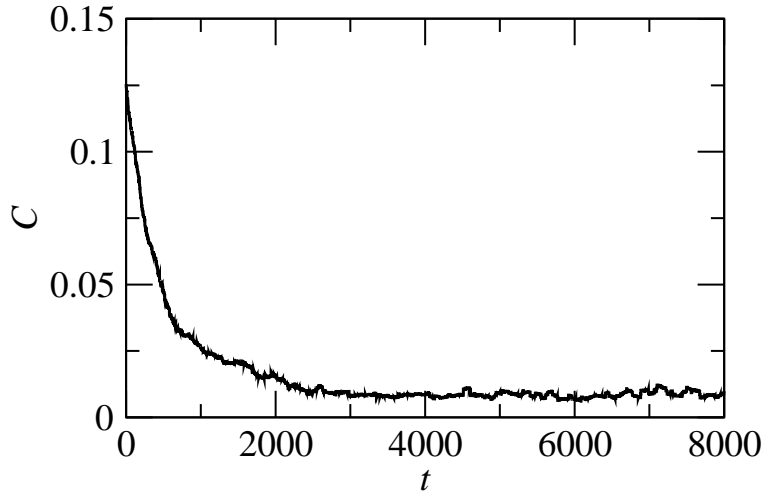

Figure S3: Time evolution of the average clustering coefficient of the high-school network during X-swap randomization.

## References

- [1] Albert, R. & Barabási, A.-L. Statistical mechanics of complex networks. *Rev. Mod. Phys.*, **74**, 47–97 (2002).
- [2] Watts, D. J. & Strogatz, S. H. Collective dynamics of ‘small-world’ networks. *Nature*, **393**, 440–442 (1998).
- [3] Gleeson, J. P. & Cahalane, D. J. Seed size strongly affects cascades on random networks. *Phys. Rev. E* **75** 056103 (2007).
